# Supplementary material for: Conversion of tetrahedral to octahedral structures upon solvent coordination: studies on the M[(OPPh2)(SePPh2)N]2(M = Co, Ni) and [Ni{(OPPh2)(EPPh2)N}2(dmf)2] (E = S, Se) complexes
Source: Royal Society of Chemistry journal article supplement (doi:10.1039/c0dt00928h), 2010-11-12

## SUPPLEMENTARY MATERIAL

### **Conversion of tetrahedral to octahedral structures upon solvent coordination: Studies on the $M[(OPPh_2)(SePPh_2)N]_2$ ( $M = Co, Ni$ ) and $[Ni\{(OPPh_2)(EPPh_2)N\}_2(dmf)_2]$ ( $E = S, Se$ ) complexes**

Eleftherios Ferentinos,<sup>a</sup> Dimitrios Maganas,<sup>a</sup> Catherine P. Raptopoulou,<sup>b</sup>  
Aris Terzis,<sup>b</sup> Vassilis Psycharis,<sup>b</sup> Neil Robertson,<sup>\*c</sup> and Panayotis Kyritsis<sup>\*a</sup>

<sup>a</sup>*Inorganic Chemistry Laboratory, Department of Chemistry, National and Kapodistrian University of Athens, Panepistimiopolis, 15771 Athens, Greece*

<sup>b</sup>*Institute of Materials Science, NCSR "Demokritos", 153 10 Aghia Paraskevi Attikis, Greece*

<sup>c</sup>*School of Chemistry and EaStChem, University of Edinburgh, West Mains Road, Edinburgh EH9 3JJ, United Kingdom*

\*Corresponding author

Tel.: +30-210-7274268; fax: +30-210-7274782 (P. Kyritsis),

E-mail addresses: kyritsis@chem.uoa.gr (P. Kyritsis)

*X-ray crystallography*

**Table S1** Crystallographic data for complexes **1 – 4**

|                                            | <b>1</b>                                                                       | <b>2</b>                                                                                       | <b>3</b>                                                                                      | <b>4</b>                                                                                       |
|--------------------------------------------|--------------------------------------------------------------------------------|------------------------------------------------------------------------------------------------|-----------------------------------------------------------------------------------------------|------------------------------------------------------------------------------------------------|
| Formula                                    | C <sub>48</sub> H <sub>40</sub> CoN <sub>2</sub> O <sub>2</sub> P <sub>4</sub> | C <sub>48</sub> H <sub>40</sub> N <sub>2</sub> NiO <sub>2</sub> P <sub>4</sub> Se <sub>2</sub> | C <sub>54</sub> H <sub>54</sub> N <sub>4</sub> NiO <sub>4</sub> P <sub>4</sub> S <sub>2</sub> | C <sub>54</sub> H <sub>54</sub> N <sub>4</sub> NiO <sub>4</sub> P <sub>4</sub> Se <sub>2</sub> |
| Fw                                         | 1017.55                                                                        | 1017.33                                                                                        | 1069.72                                                                                       | 1163.52                                                                                        |
| Space group                                | <i>P2</i> <sub>1</sub> / <i>c</i>                                              | <i>P2</i> <sub>1</sub> / <i>c</i>                                                              | <i>P</i> $\bar{1}$                                                                            | <i>P</i> $\bar{1}$                                                                             |
| <i>T</i> , °C                              | 25                                                                             | 25                                                                                             | 25                                                                                            | 25                                                                                             |
| $\lambda$ , Å                              | Mo K $\alpha$                                                                  | Mo K $\alpha$                                                                                  | Mo K $\alpha$                                                                                 | Mo K $\alpha$                                                                                  |
| <i>a</i> , Å                               | 12.593(3)                                                                      | 12.602(5)                                                                                      | 9.3092(2)                                                                                     | 9.326(4)                                                                                       |
| <i>b</i> , Å                               | 18.466(5)                                                                      | 18.425(7)                                                                                      | 10.3818(2)                                                                                    | 10.505(5)                                                                                      |
| <i>c</i> , Å                               | 19.534(5)                                                                      | 19.582(8)                                                                                      | 13.2729(2)                                                                                    | 13.500(6)                                                                                      |
| $\alpha$ , (°)                             |                                                                                |                                                                                                | 89.175(1)                                                                                     | 88.89(1)                                                                                       |
| $\beta$ , (°)                              | 99.92(1)                                                                       | 100.140(10)                                                                                    | 85.612(1)                                                                                     | 86.33(1)                                                                                       |
| $\gamma$ , (°)                             |                                                                                |                                                                                                | 84.502(1)                                                                                     | 85.30(1)                                                                                       |
| <i>V</i> , Å <sup>3</sup>                  | 4475(2)                                                                        | 4476(3)                                                                                        | 1273.10(4)                                                                                    | 1315.3(10)                                                                                     |
| <i>Z</i>                                   | 4                                                                              | 4                                                                                              | 1                                                                                             | 1                                                                                              |
| $\rho_{\text{calcd}}$ , g cm <sup>-3</sup> | 1.510                                                                          | 1.510                                                                                          | 1.395                                                                                         | 1.469                                                                                          |
| $\mu$ , mm <sup>-1</sup>                   | 2.195 (Mo K $\alpha$ )                                                         | 2.244 (Mo K $\alpha$ )                                                                         | 0.639 (Mo K $\alpha$ )                                                                        | 1.923 (Mo K $\alpha$ )                                                                         |
| <i>R</i> 1 <sup>a</sup>                    | 0.0495 <sup>b</sup>                                                            | 0.0581 <sup>c</sup>                                                                            | 0.0240 <sup>d</sup>                                                                           | 0.0394 <sup>e</sup>                                                                            |
| w <i>R</i> 2 <sup>a</sup>                  | 0.1193 <sup>b</sup>                                                            | 0.1360 <sup>c</sup>                                                                            | 0.06328 <sup>d</sup>                                                                          | 0.1033 <sup>e</sup>                                                                            |

$$^a w = 1/[\sigma^2(F_o^2) + (aP)^2 + bP] \text{ and } P = (\max(F_o^2, 0) + 2F_c^2)/3;$$

$$R1 = \Sigma(|F_o| - |F_c|) / \Sigma(|F_o|) \text{ and } wR2 = D^{1/2}$$

<sup>b</sup>for 4828 reflections with  $I > 2\sigma(I)$ ; <sup>c</sup>for 4956 reflections with  $I > 2\sigma(I)$ ; <sup>d</sup>for 4753 reflections with  $I > 2\sigma(I)$ ; <sup>e</sup>for 3931 reflections with  $I > 2\sigma(I)$ .

*Further experimental crystallographic details*

**Co[(OPPh<sub>2</sub>)(SePPh<sub>2</sub>)N]<sub>2</sub> (1):**  $2\theta_{\max} = 46^\circ$ ; reflections collected/unique/used, 6433/6221 [ $R_{\text{int}} = 0.0252$ ]/6221; 706 parameters refined;  $(\Delta/\sigma)_{\max} = 0.001$ ;  $(\Delta\rho)_{\max}/(\Delta\rho)_{\min} = 0.989/-0.600 \text{ e}/\text{\AA}^3$ ;  $R1/wR2$  (for all data), 0.0712/0.1313. All hydrogen atoms were located by difference maps and were refined isotropically. All non-hydrogen atoms were refined anisotropically.

**Ni[(OPPh<sub>2</sub>)(SePPh<sub>2</sub>)N]<sub>2</sub> (2):**  $2\theta_{\max} = 47^\circ$ ; reflections collected/unique/used, 6837/6616 [ $R_{\text{int}} = 0.0238$ ]/6616; 706 parameters refined;  $(\Delta/\sigma)_{\max} = 0.002$ ;  $(\Delta\rho)_{\max}/(\Delta\rho)_{\min} = 0.699/-0.568 \text{ e}/\text{\AA}^3$ ;  $R1/wR2$  (for all data), 0.0871/0.1537. All hydrogen atoms were either located by difference maps and were refined isotropically or were introduced at calculated positions as riding on bonded atoms. All non-hydrogen atoms were refined anisotropically.

**[Ni{(OPPh<sub>2</sub>)(SPPPh<sub>2</sub>)N}<sub>2</sub>(dmf)<sub>2</sub>] (3):**  $2\theta_{\max} = 52^\circ$ ; reflections collected/unique/used, 24276/4992 [ $R_{\text{int}} = 0.0142$ ]/4992; 421 parameters refined;  $(\Delta/\sigma)_{\max} = 0.007$ ;  $(\Delta\rho)_{\max}/(\Delta\rho)_{\min} = 0.399/-0.227 \text{ e}/\text{\AA}^3$ ;  $R1/wR2$  (for all data), 0.0251/0.0637. All hydrogen atoms were located by difference maps and were refined isotropically. All non-hydrogen atoms were refined anisotropically.

**[Ni{(OPPh<sub>2</sub>)(SePPh<sub>2</sub>)N}<sub>2</sub>(dmf)<sub>2</sub>] (4):**  $2\theta_{\max} = 50^\circ$ ; reflections collected/unique/used, 4765/4453 [ $R_{\text{int}} = 0.0083$ ]/4453; 401 parameters refined;  $(\Delta/\sigma)_{\max} = 0.001$ ;  $(\Delta\rho)_{\max}/(\Delta\rho)_{\min} = 0.633/-0.545 \text{ e}/\text{\AA}^3$ ;  $R1/wR2$  (for all data), 0.0458/0.1088. All hydrogen atoms were either located by difference maps and were refined isotropically or were introduced at calculated positions as riding on bonded atoms. All non-hydrogen atoms were refined anisotropically.

### UV-vis spectroscopy

The electronic spectra in CH<sub>2</sub>Cl<sub>2</sub> of complexes **1** (blue), as well as for Ni[(OPPh<sub>2</sub>)(SPPPh<sub>2</sub>)N]<sub>2</sub> (light blue) and **2** (green), exhibit characteristic d-d bands (bands 1-3, Table S2) of tetrahedral Co(II),<sup>1,2</sup> and Ni(II) complexes, respectively.<sup>1,3,4</sup> Band 4 in Table S2 reflects a charge transfer transition.<sup>4</sup> When light yellow crystals of complexes **3** and **4** are dissolved in CH<sub>2</sub>Cl<sub>2</sub>, they turn to light blue and green, respectively. The spectra of **3** and **4** are identical to those of Ni[(OPPh<sub>2</sub>)(SPPPh<sub>2</sub>)N]<sub>2</sub> and **2**, respectively (Table S2), providing evidence that the dmf molecules are removed from the coordination sphere of **3** and **4**, which revert to the corresponding tetrahedral Ni[(OPPh<sub>2</sub>)(SPPPh<sub>2</sub>)N]<sub>2</sub> and **2** complexes.

**Table S2** The main transition bands (cm<sup>-1</sup>) of complexes **1** – **4** and Ni[(OPPh<sub>2</sub>)(SPPPh<sub>2</sub>)N]<sub>2</sub>. In parenthesis, the corresponding extinction coefficients (ε, M<sup>-1</sup>/cm<sup>-1</sup>) are listed

| Complex                                                     | Band 1      | Band 2      | Band 3      | Band 4       |
|-------------------------------------------------------------|-------------|-------------|-------------|--------------|
| <b>1</b>                                                    | 13660 (232) | 15700 (385) | 17500 (416) |              |
| Ni[(OPPh <sub>2</sub> )(SPPPh <sub>2</sub> )N] <sub>2</sub> | 14470 (145) | 16020 (88)  | 18010 (62)  | 30670 (2800) |
| <b>2</b>                                                    | 14020 (166) | 15570 (103) | 17540 (90)  | 28570 (2450) |
| <b>3</b>                                                    | 14490       | 16000       | 18180       | 30770        |
| <b>4</b>                                                    | 14020       | 15570       | 17540       | 28490        |

1. B. N. Figgis and M. A. Hitchman, *Ligand Field Theory and its Applications*, Wiley-VCH, 2000.
2. D. Maganas, S. S. Staniland, A. Grigoropoulos, F. White, S. Parsons, N. Robertson, P. Kyritsis and G. Pneumatikakis, *Dalton Trans.*, 2006, 2301.
3. A. Davison and E. S. Switkes, *Inorg. Chem.*, 1971, **10**, 837.
4. D. Maganas, A. Grigoropoulos, S. S. Staniland, S. D. Chatziefthimiou, A. Harrison, N. Robertson, P. Kyritsis and F. Neese, *Inorg. Chem.*, 2010, **49**, 5079.

### Geometry optimization parameters

The BP86/def2-TZVP/DKH-optimized structures (the coordinates of which are listed in Table S4) provide Ni–X bond lengths (Table S3) and X–Ni–X angles, X = S, O, which are in very good agreement with the crystallographic ones (within  $\sim 0.03$  Å and  $\sim 1-5^\circ$ , respectively).

**Table S3** Calculated (BP86/TZVP/DKH-optimized) and crystallographic Ni–X bond lengths (Å) and X–Ni–X angles ( $^\circ$ ), and relevant Löwdin bond orders.

|        |                    | Crystallographic                                                                | Calculated                                            | Löwdin Bond Order |
|--------|--------------------|---------------------------------------------------------------------------------|-------------------------------------------------------|-------------------|
|        |                    | <b>Ni[(OPPh<sub>2</sub>)(SPMe<sub>2</sub>)N]<sub>2</sub><sup>a</sup></b>        | <b>Ni<sup>H,H</sup>L<sub>2</sub></b>                  |                   |
| Ni–X   | Ni–S               | 2.306(4)                                                                        | 2.27                                                  | 0.82              |
|        | Ni–O               | 1.959(7)                                                                        | 1.96                                                  | 0.53              |
| X–Ni–X | S–N–S'             | 107.2(1)                                                                        | 104.1                                                 |                   |
|        | O–Ni–O'            | 101.8(3)                                                                        | 100.1                                                 |                   |
|        | O–Ni–S             | 103.8(2)                                                                        | 105.0                                                 |                   |
|        | O–Ni–S'            | 104.7(2)                                                                        | 106.5                                                 |                   |
|        | O'–Ni–S            | 127.2(1)                                                                        | 132.1                                                 |                   |
|        |                    | <b>[Ni{(OPPh<sub>2</sub>)(SPPH<sub>2</sub>)N}<sub>2</sub>(dmf)<sub>2</sub>]</b> | <b>Ni<sup>H,H</sup>L<sub>2</sub>(dmf)<sub>2</sub></b> |                   |
| Ni–X   | Ni–S               | 2.5181(4)                                                                       | 2.51                                                  | 0.41              |
|        | Ni–O               | 2.0205(9)                                                                       | 2.07                                                  | 0.37              |
|        | Ni–O(dm f)         | 2.0679(10)                                                                      | 2.09                                                  | 0.40              |
| X–Ni–X | S–Ni–S'            | 180                                                                             | 180                                                   |                   |
|        | O–Ni–O'            | 180                                                                             | 180                                                   |                   |
|        | O–Ni–S             | 93.88(3)                                                                        | 96.9                                                  |                   |
|        | O–Ni–S'            | 86.12(3)                                                                        | 82.6                                                  |                   |
|        | O(dm f)–Ni–O(dm f) | 180                                                                             | 180                                                   |                   |

<sup>a</sup>The corresponding Ni[(OPPh<sub>2</sub>)(SPPH<sub>2</sub>)N]<sub>2</sub> complex provide X–Ni–X angles strongly influenced by the bulky phenyl groups environment. Therefore, a better agreement was found for the less strained Ni[(OPPh<sub>2</sub>)(SPMe<sub>2</sub>)N]<sub>2</sub> complex, the structural parameters of which are listed.<sup>5</sup>

5. A. Silvestru, D. Bilc, R. Rosler, J. E. Drake and I. Haiduc, *Inorg. Chim. Acta*, 2000, **305**, 106.

**Table S4** The Cartesian coordinates of the BP86/def2-TZVP-optimized structures  $C_{2v}(I)$  and  $^{Oh}C_i$ , corresponding to the  $Ni^{H,H}L_2$  and  $Ni^{H,H}L_2(dmf)_2$  models, respectively.

**$C_{2v}(I)$ : BP86/def2-TZVP**

|    |              |             |              |
|----|--------------|-------------|--------------|
| Ni | 2.470531000  | 3.398818000 | 1.791646000  |
| S  | 1.598051000  | 1.383806000 | 2.363461000  |
| S  | 2.692150000  | 4.485611000 | 3.794395000  |
| P  | -0.371581000 | 4.378180000 | 1.263526000  |
| P  | -0.287225000 | 1.980048000 | 2.809386000  |
| P  | 5.009840000  | 5.050831000 | 1.119897000  |
| P  | 3.334628000  | 6.276066000 | 3.067310000  |
| O  | 1.088119000  | 4.360441000 | 0.784054000  |
| O  | 4.061374000  | 3.899715000 | 0.760200000  |
| N  | -1.028470000 | 3.054053000 | 1.881042000  |
| N  | 4.431562000  | 6.327615000 | 1.902573000  |
| H  | -1.190679000 | 4.740772000 | 0.169662000  |
| H  | -0.548262000 | 5.467839000 | 2.163474000  |
| H  | -1.107551000 | 0.827312000 | 2.832606000  |
| H  | -0.311660000 | 2.370805000 | 4.177422000  |
| H  | 5.605156000  | 5.573283000 | -0.052208000 |
| H  | 6.123899000  | 4.503387000 | 1.813847000  |
| H  | 3.784290000  | 7.023485000 | 4.187286000  |
| H  | 2.217828000  | 7.050933000 | 2.658420000  |

---

*Oh*C<sub>i</sub>: BP86/def2-TZVP

|    |             |              |              |
|----|-------------|--------------|--------------|
| Ni | 5.162303000 | 0.047189000  | 6.616704000  |
| N  | 5.960947000 | -1.474889000 | 9.929129000  |
| O  | 5.625511000 | 0.852692000  | 8.466676000  |
| S  | 3.994628000 | -2.010501000 | 7.460580000  |
| P  | 4.506622000 | -2.050212000 | 9.433239000  |
| P  | 6.402252000 | 0.056726000  | 9.560306000  |
| H  | 4.482019000 | -3.392240000 | 9.914391000  |
| H  | 3.428419000 | -1.481550000 | 10.201021000 |
| H  | 7.803755000 | -0.006986000 | 9.289141000  |
| H  | 6.364488000 | 0.865872000  | 10.746537000 |
| O  | 3.346446000 | 1.091401000  | 6.649759000  |
| C  | 3.286951000 | 2.172735000  | 7.257920000  |
| H  | 2.162309000 | 3.826159000  | 7.755092000  |
| N  | 2.169945000 | 2.927629000  | 7.286540000  |
| H  | 1.354189000 | 2.643025000  | 6.751086000  |
| H  | 4.144283000 | 2.562917000  | 7.829846000  |
| N  | 4.363757000 | 1.569196000  | 3.304226000  |
| O  | 4.699061000 | -0.758353000 | 4.766757000  |
| S  | 6.330020000 | 2.104806000  | 5.772820000  |
| P  | 5.818088000 | 2.144470000  | 3.800131000  |
| P  | 3.922363000 | 0.037618000  | 3.673103000  |
| H  | 5.842789000 | 3.486602000  | 3.318900000  |
| H  | 6.896323000 | 1.575709000  | 3.032401000  |
| H  | 2.520764000 | 0.101425000  | 3.944287000  |
| H  | 3.960086000 | -0.771624000 | 2.486813000  |

|   |             |              |             |
|---|-------------|--------------|-------------|
| O | 6.978157000 | -0.997025000 | 6.583634000 |
| C | 7.037677000 | -2.078389000 | 5.975537000 |
| H | 8.162318000 | -3.731930000 | 5.478490000 |
| N | 8.154714000 | -2.833245000 | 5.946919000 |
| H | 8.970468000 | -2.548594000 | 6.482373000 |
| H | 6.180348000 | -2.468632000 | 5.403643000 |



**Figure S1** The most important BP86/def2-TZVP structures along the  $C_{2v(I)} \rightarrow C_{2v(II)} \rightarrow {}^{Oh}C_i$  interconversion pathway

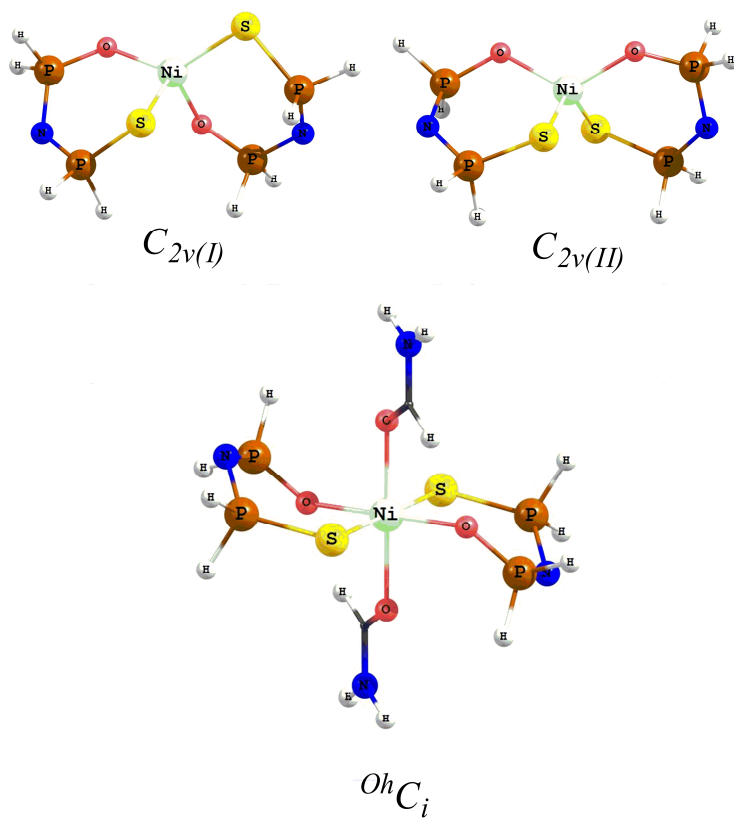

Supplement: c0dt00928h.pdf [file c0dt00928h.pdf]
